# Supplementary material for: A systematic analysis of splicing variants identifies new diagnoses in the 100,000 Genomes Project
Source: PubMed Central journal article supplement (PMC9327385; doi:10.1186/s13073-022-01087-x), 2022-07-26
Supplement: 13073_2022_1087_MOESM1_ESM.pdf [file 13073_2022_1087_MOESM1_ESM.pdf]

Fig S1

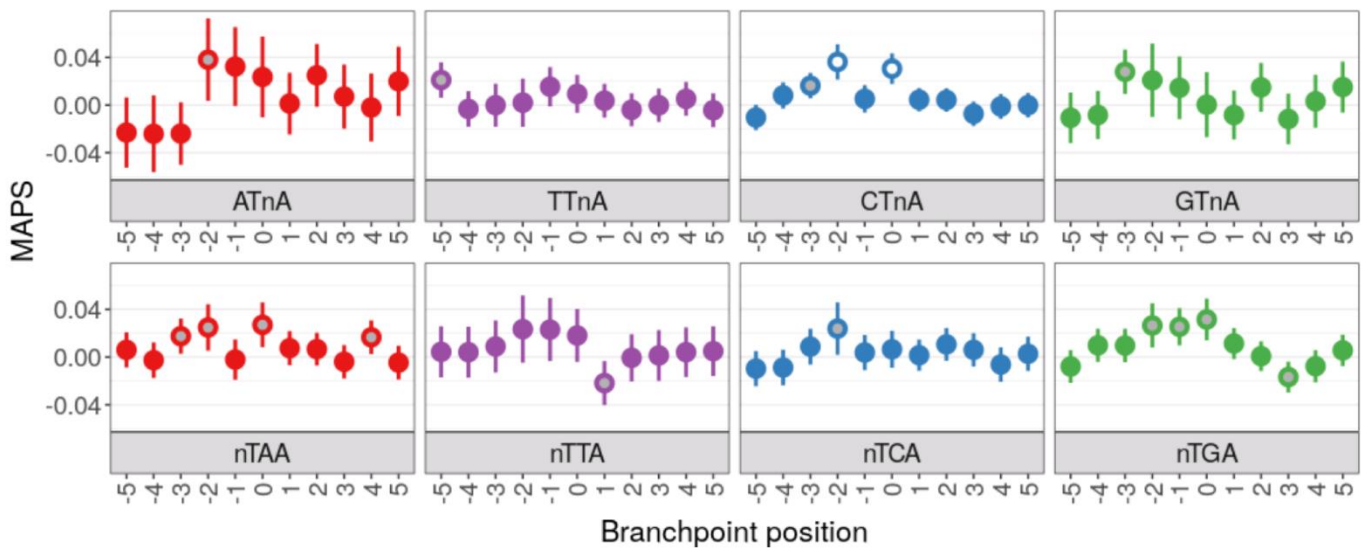

Constraint at predicted splicing branchpoints, stratified by reference allele at BP-3 and BP-1 positions. For LaBranchoR-predicted branchpoints with reference A and T nucleotides at the BP0 and BP-2 positions (nTnA motif,  $n = 165,564$ ), we calculated MAPS after stratifying by the reference allele at BP-3 and BP-1 positions. Sites which are significantly constrained after Bonferroni correction (88 tests,  $\alpha = 0.05$ ,  $p < 5.8 \times 10^{-4}$ ) are shown with white points. Sites with nominally significant constraint ( $p < 0.05$ ) are shown with grey points. We are generally underpowered to detect motif-specific constraints at these loci.

Fig S2

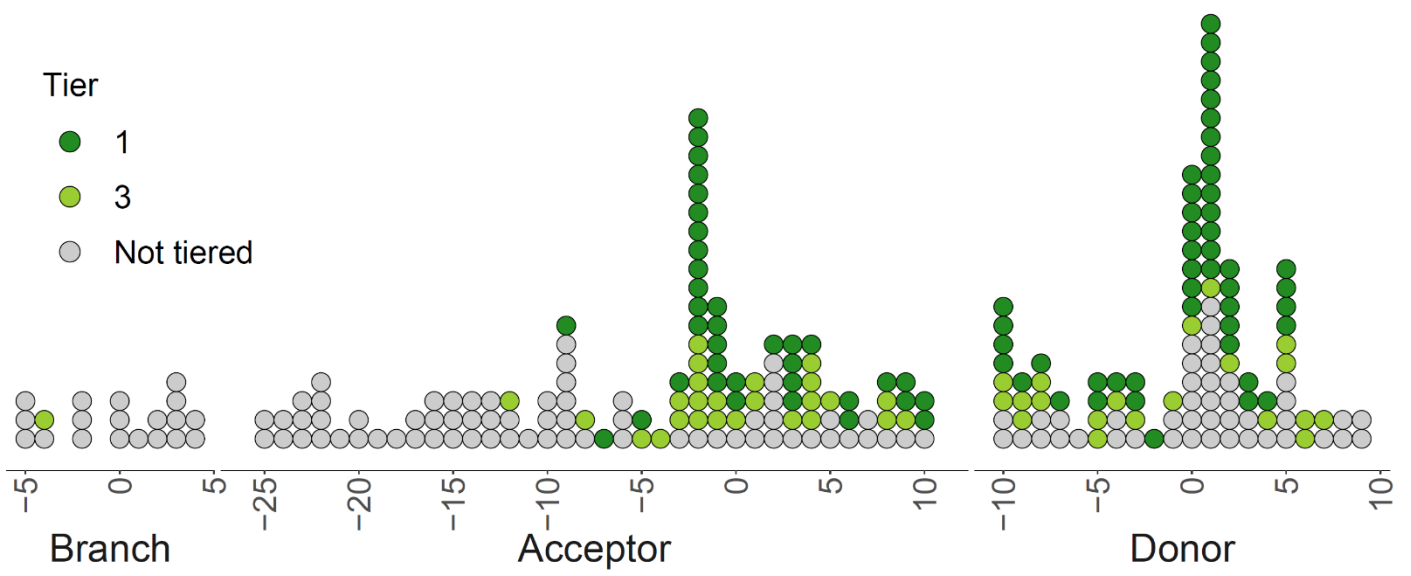

Tiering data for splicing DNVs in known monoallelic loss-of-function rare disease genes. Each point represents a DNV in a rare disease proband. Points are coloured by the “tier” of that variant in the GEL annotation pipeline (see Methods).

Fig S3

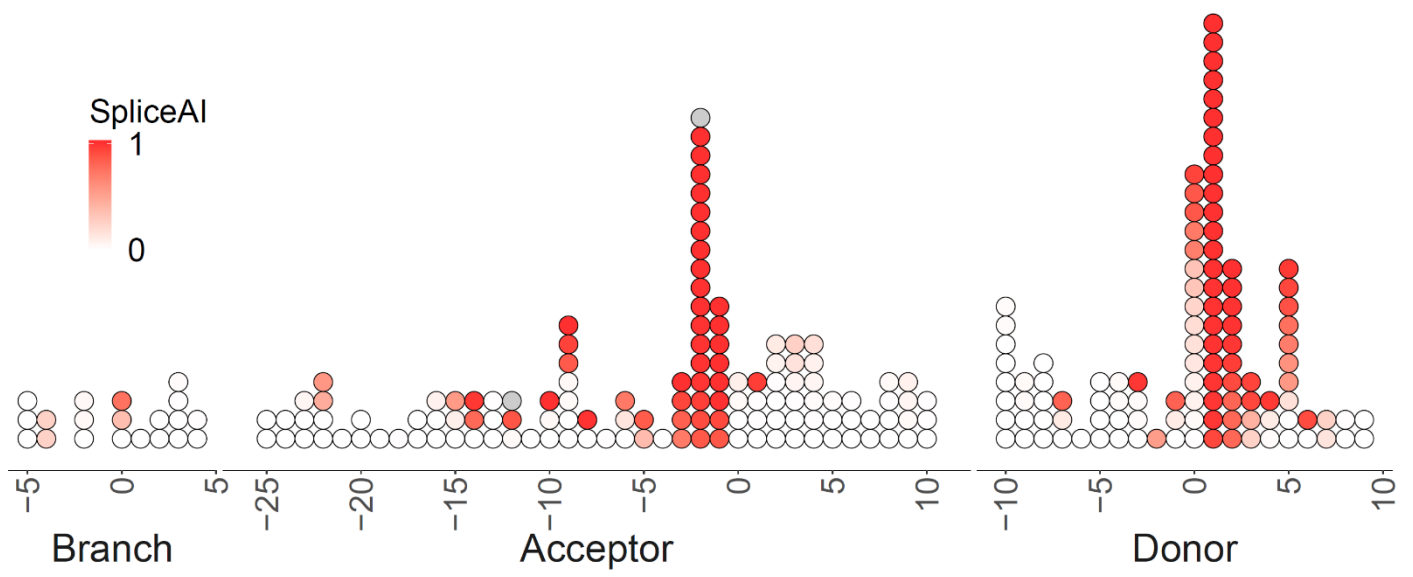

SpliceAI scores of splicing DNVs in known monoallelic loss-of-function rare disease genes. Each point represents a DNV in a rare disease proband. Points are coloured by SpliceAI score; grey points indicate that no SpliceAI annotation is available.

Fig S4

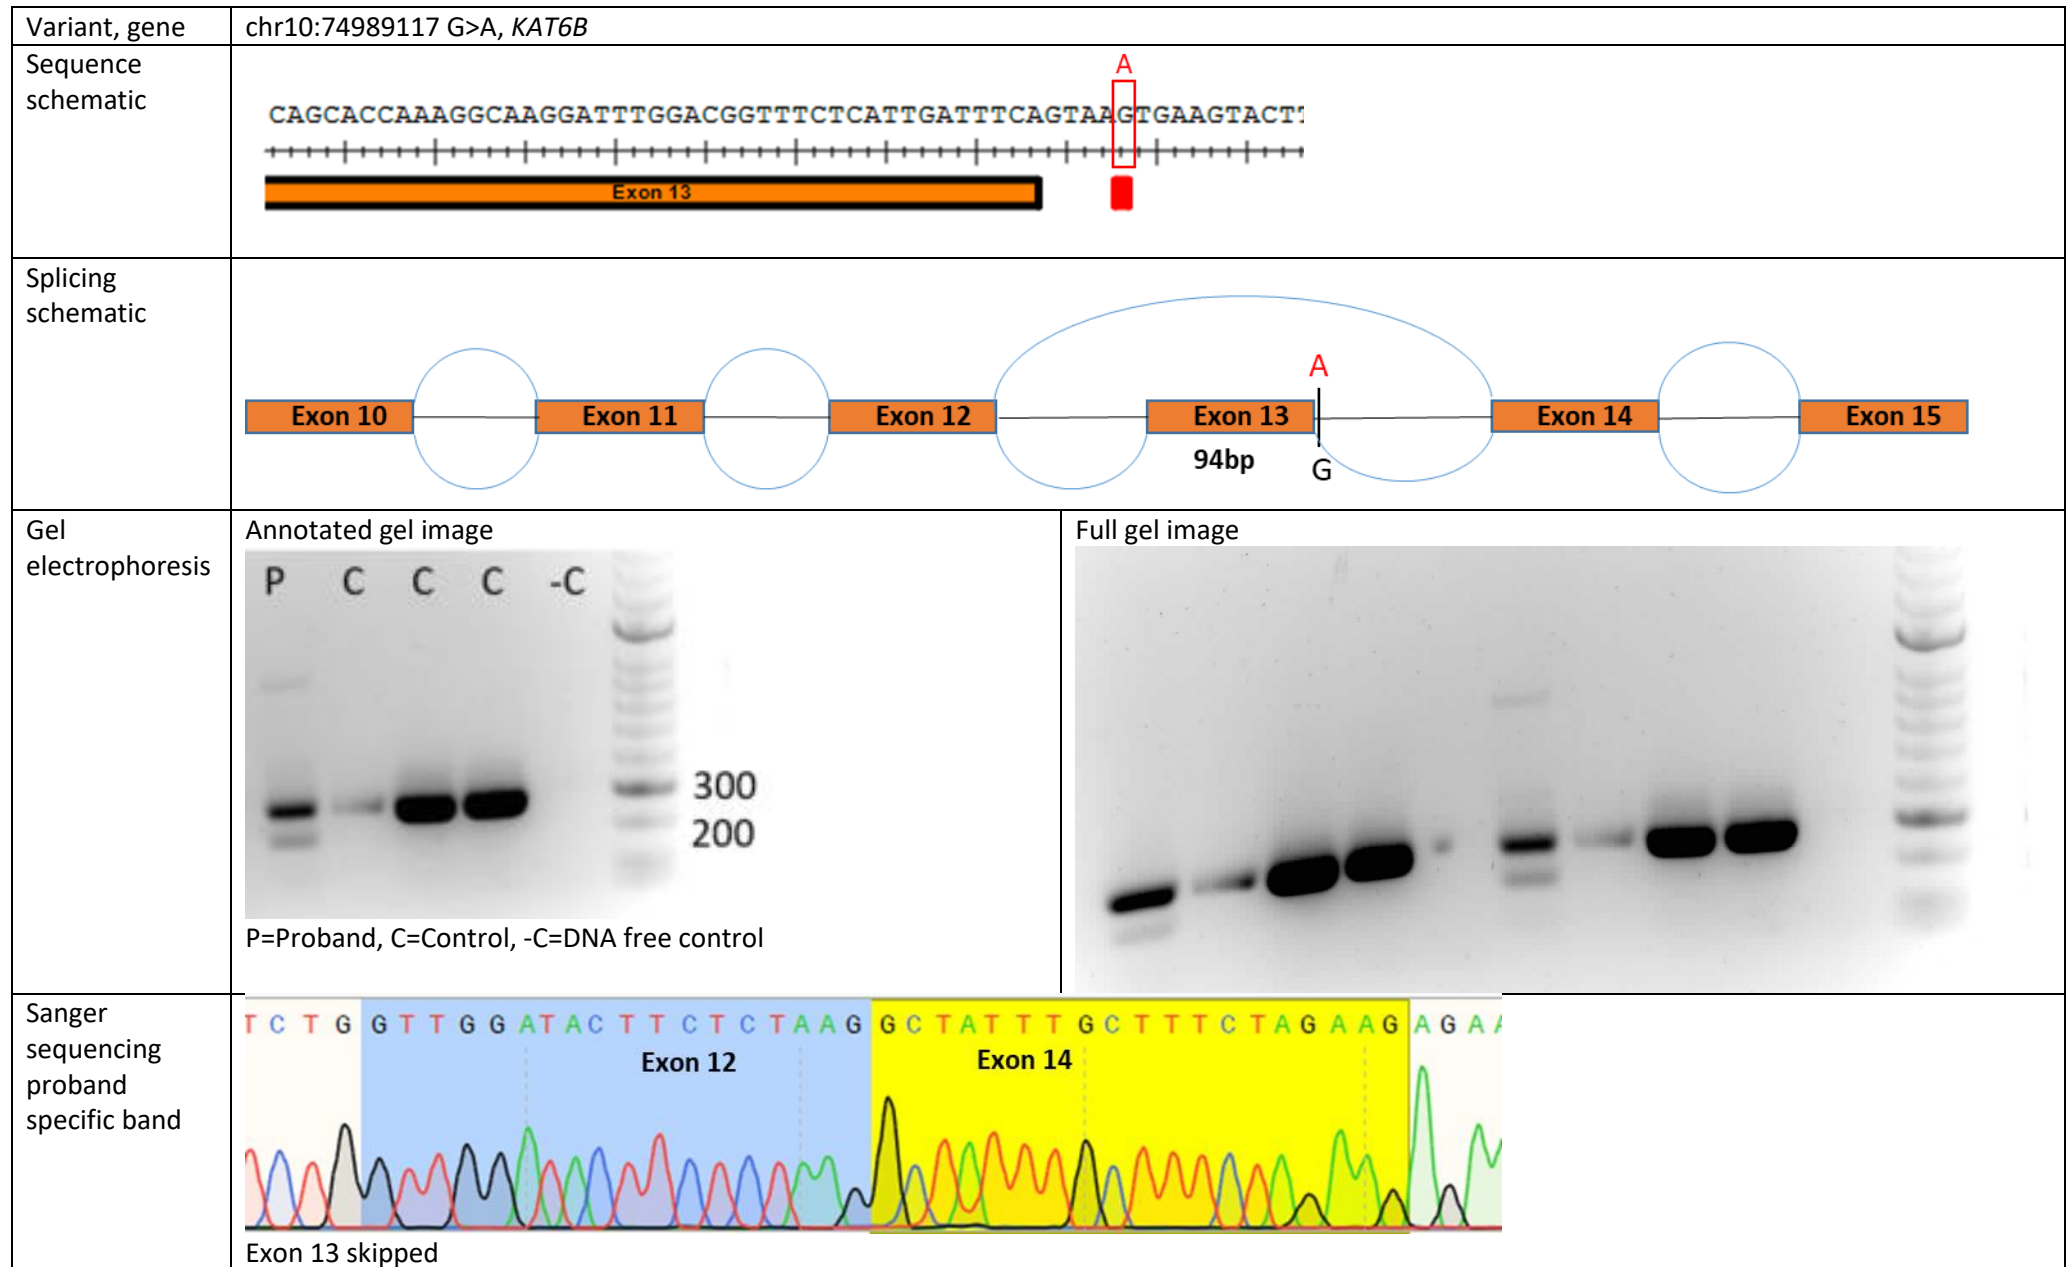

|                                         |                                                                                                                                                                        |                                                                                                           |
|-----------------------------------------|------------------------------------------------------------------------------------------------------------------------------------------------------------------------|-----------------------------------------------------------------------------------------------------------|
| Variant, gene                           | chr17:62596679 G>A, <i>TLK2</i>                                                                                                                                        |                                                                                                           |
| Sequence schematic                      | <p>ATACTGACTCGTAAAGT<sup>A</sup>GCTGTGCTGTTTTACCTTAACAGTTATATTATTTCTTGCAATGCTG.</p>  |                                                                                                           |
| Splicing schematic                      |                                                                                      |                                                                                                           |
| Gel electrophoresis                     | <p>Annotated gel image</p>  <p>P=Proband, C=Control</p>                              | <p>Full gel image</p>  |
| Sanger sequencing proband specific band |  <p>Exon 17 skipped</p>                                                             |                                                                                                           |

|                                         |                                                                                                                                                               |                                                                                                            |
|-----------------------------------------|---------------------------------------------------------------------------------------------------------------------------------------------------------------|------------------------------------------------------------------------------------------------------------|
| Variant, gene                           | chr1:26767787 C>G, ARID1A                                                                                                                                     |                                                                                                            |
| Sequence schematic                      | <p>AATCTGACCCATTCCCTATGAATTTTGACCTGAACCTTCCAGAAATCCAGTTCTTCTACTACAACCA</p> 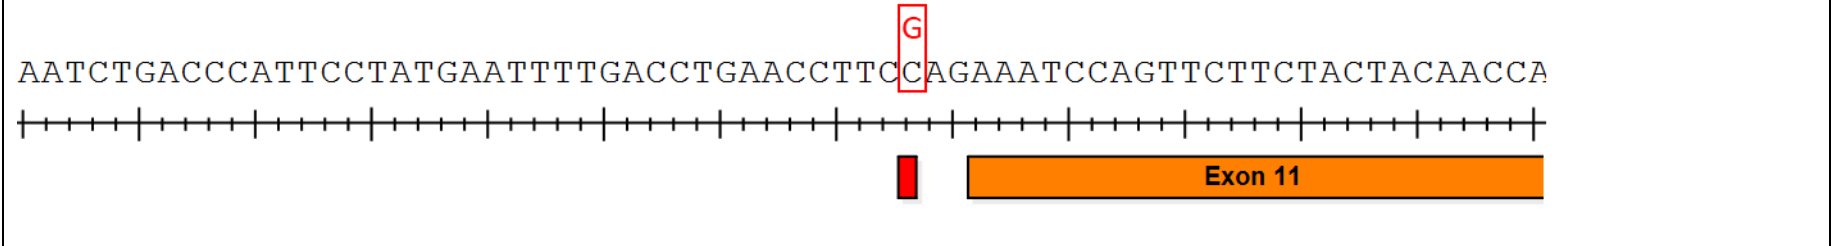 |                                                                                                            |
| Splicing schematic                      |                                                                             |                                                                                                            |
| Gel electrophoresis                     | <p>Annotated gel image</p>  <p>P=proband, C=Control</p>                     | <p>Full gel image</p>  |
| Sanger sequencing proband specific band |  <p>Exon 11 skipped</p>                                                   |                                                                                                            |

|                                         |                                                                                                                                                                                           |                                                                                                            |
|-----------------------------------------|-------------------------------------------------------------------------------------------------------------------------------------------------------------------------------------------|------------------------------------------------------------------------------------------------------------|
| Variant, gene                           | chr16:8905182 C>A, <i>USP7</i>                                                                                                                                                            |                                                                                                            |
| Sequence schematic                      | <p>'TACATGTTAGTCTACATCAGGGAATCAA<sup>A</sup>ACTGAGTGA<sup>T</sup>GAGTAGTGTTCAC<sup>T</sup>TTTGTTC'</p> 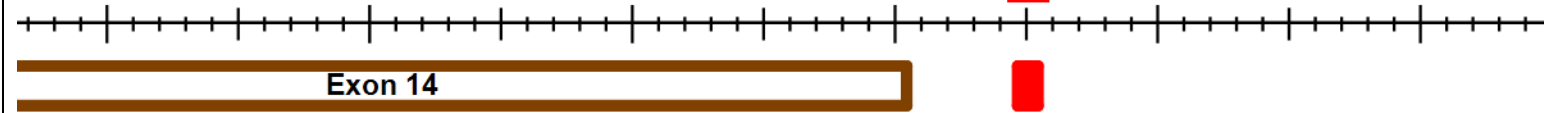 |                                                                                                            |
| Splicing schematic                      |                                                                                                         |                                                                                                            |
| Gel electrophoresis                     | <p>Annotated gel image</p>  <p>P=proband, C=Control, NC = no template control</p>                        | <p>Full gel image</p>  |
| Sanger sequencing proband specific band |  <p>Exon 14 skipped</p>                                                                               |                                                                                                            |





Functional outcomes for participant samples which were characterised by RT-PCR. Each page illustrates the following: a schematic of variant position relative to the exon/intron junction, a schematic of the splicing consequence of each variant, gel electrophoresis of amplified RT-PCR products for participant and control samples (cropped annotated image for clarity, plus full gel image), Sanger sequencing trace for proband-specific bands.
